# Supplementary material for: Magnetic and conductive graphene papers toward thin layers of effective electromagnetic shielding
Source: Royal Society of Chemistry journal article supplement (doi:10.1039/c4ta05939e), 2014-11-24
Supplement: c4ta05939e1.pdf [file c4ta05939e1.pdf]

***Electronic Supplementary Information***

**Magnetic and conductive graphene papers toward thin layers of effective electromagnetic shielding**

Wei-Li Song,<sup>†</sup> Xiao-Tian Guan,<sup>†</sup> Li-Zhen Fan,<sup>†,\*</sup> Wen-Qiang Cao,<sup>‡</sup> Chan-Yuan Wang,<sup>||</sup>  
Quan-Liang Zhao,<sup>§</sup> Mao-Sheng Cao<sup>‡,\*</sup>

*<sup>†</sup>Institute of Advanced Materials and Technology, University of Science and Technology  
Beijing, Beijing, 100083, P. R. China.*

*<sup>‡</sup>School of Materials Science and Engineering, Beijing Institute of Technology, Beijing,  
100081, P. R. China.*

*<sup>§</sup>School of Electrical and Mechanical Engineering, North China University of  
Technology, Beijing, 100144, P. R. China.*

*<sup>||</sup>310 Department, Third Institution of China Aerospace Science & Industry, Beijing  
100071, P. R. China.*

\* Corresponding Authors: Tel/Fax: +86 10 6233-3548, +86 10 6891-4062.

Email: [fanlizhen@ustb.edu.cn](mailto:fanlizhen@ustb.edu.cn) (Li-Zhen Fan), [caomaosheng@bit.edu.cn](mailto:caomaosheng@bit.edu.cn) (Mao-Sheng Cao).

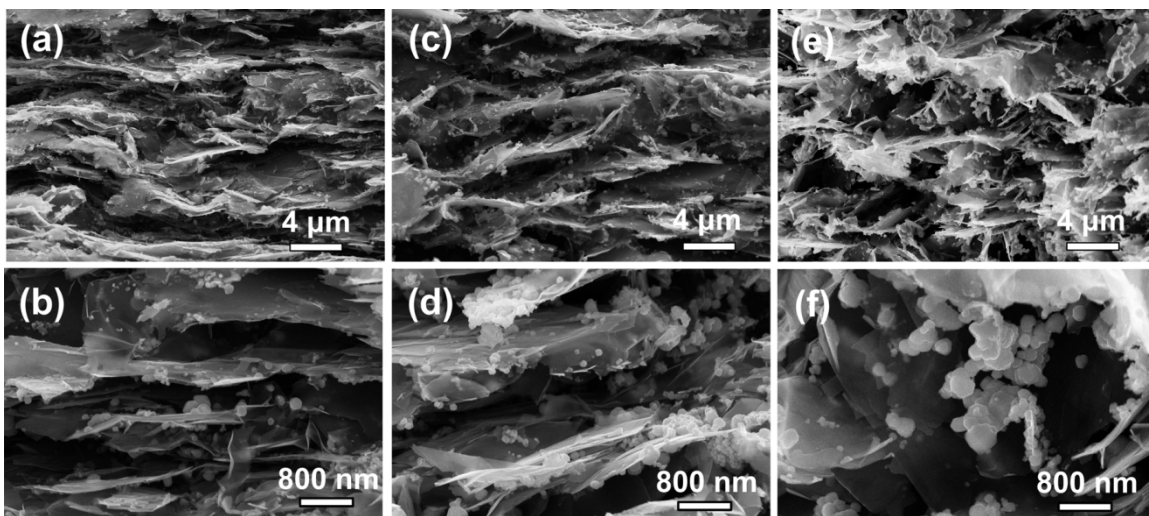

Figure S1 SEM images of the cross-section views on  $\text{Fe}_3\text{O}_4/\text{GN}$ -1 (a) and (b),  $\text{Fe}_3\text{O}_4/\text{GN}$ -2 (c) and (d),  $\text{Fe}_3\text{O}_4/\text{GN}$ -4 (e) and (f).

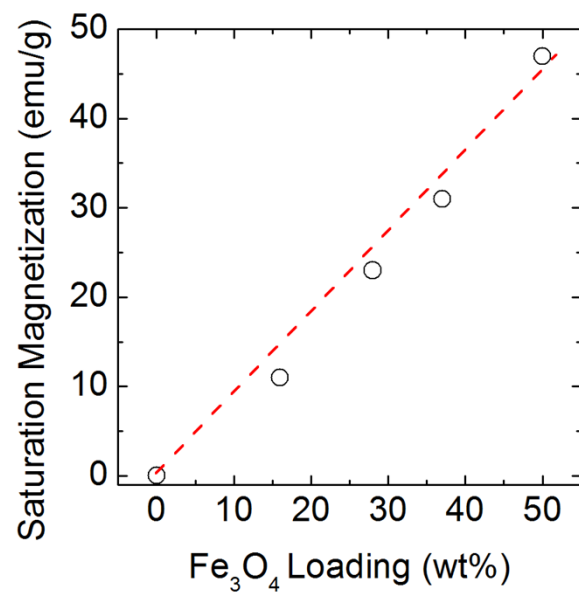

Figure S2 Relation of saturation magnetization and  $\text{Fe}_3\text{O}_4$  loadings.

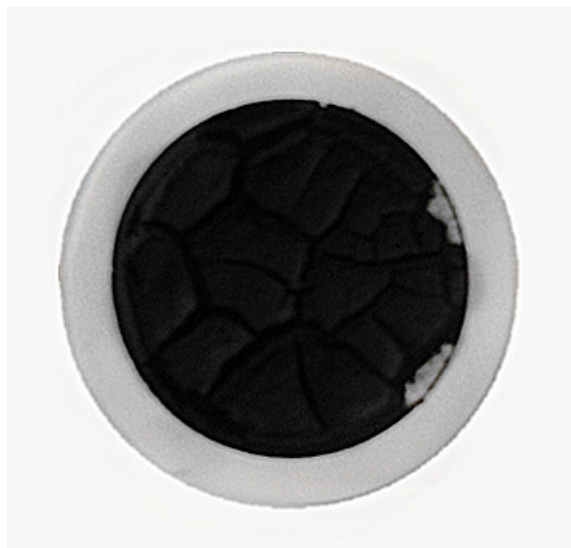

Figure S3. Fabrication of Fe<sub>3</sub>O<sub>4</sub>/RGO hybrids with 50 wt% Fe<sub>3</sub>O<sub>4</sub>.
